# Supplementary material for: A Novel Tool for the Analysis and Detection of Copy Number Variants Associated with Haemoglobinopathies
Source: MDPI journal article supplement (doi:10.3390/ijms232415920), 2022-12-14
Supplement: s1 [file s1]

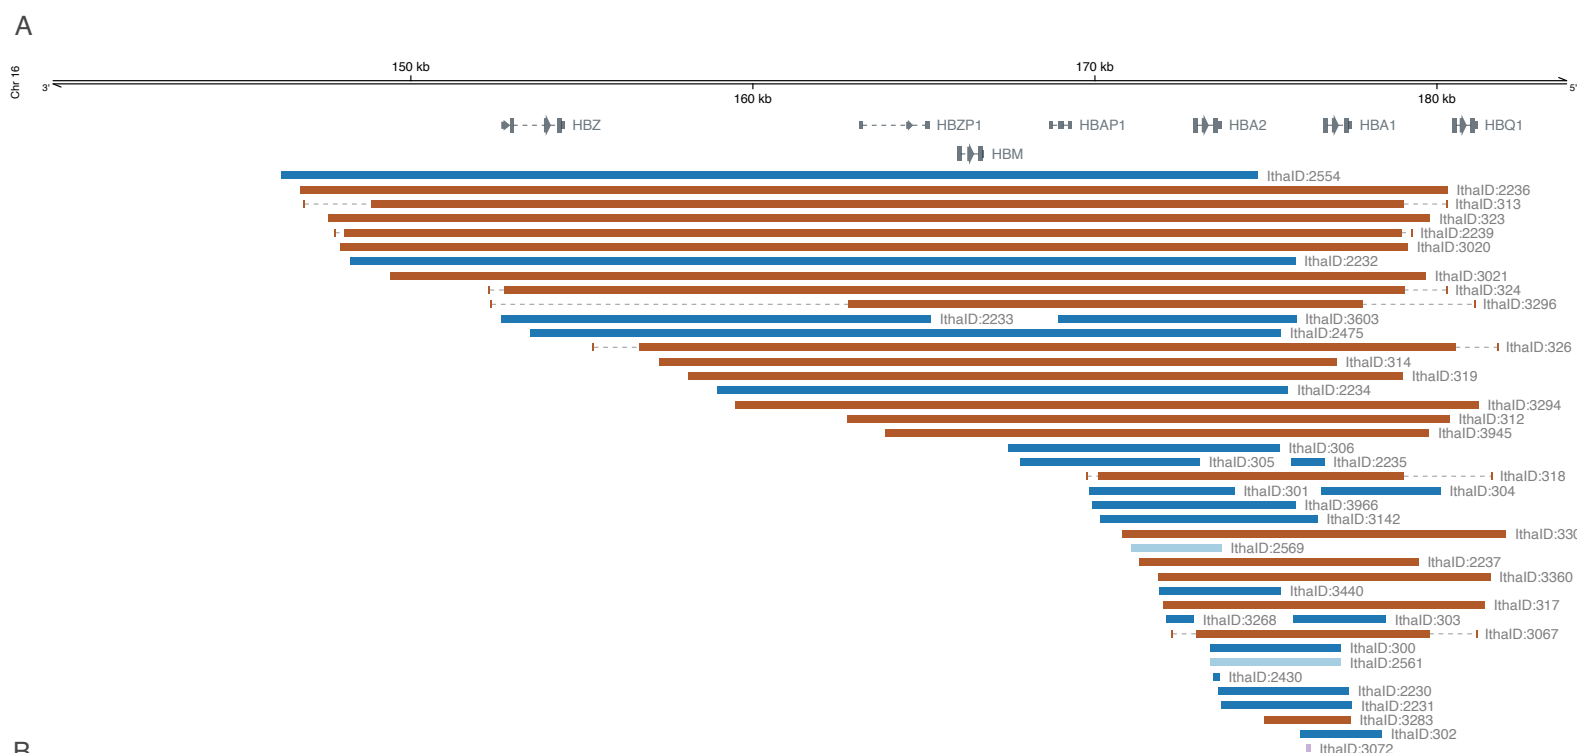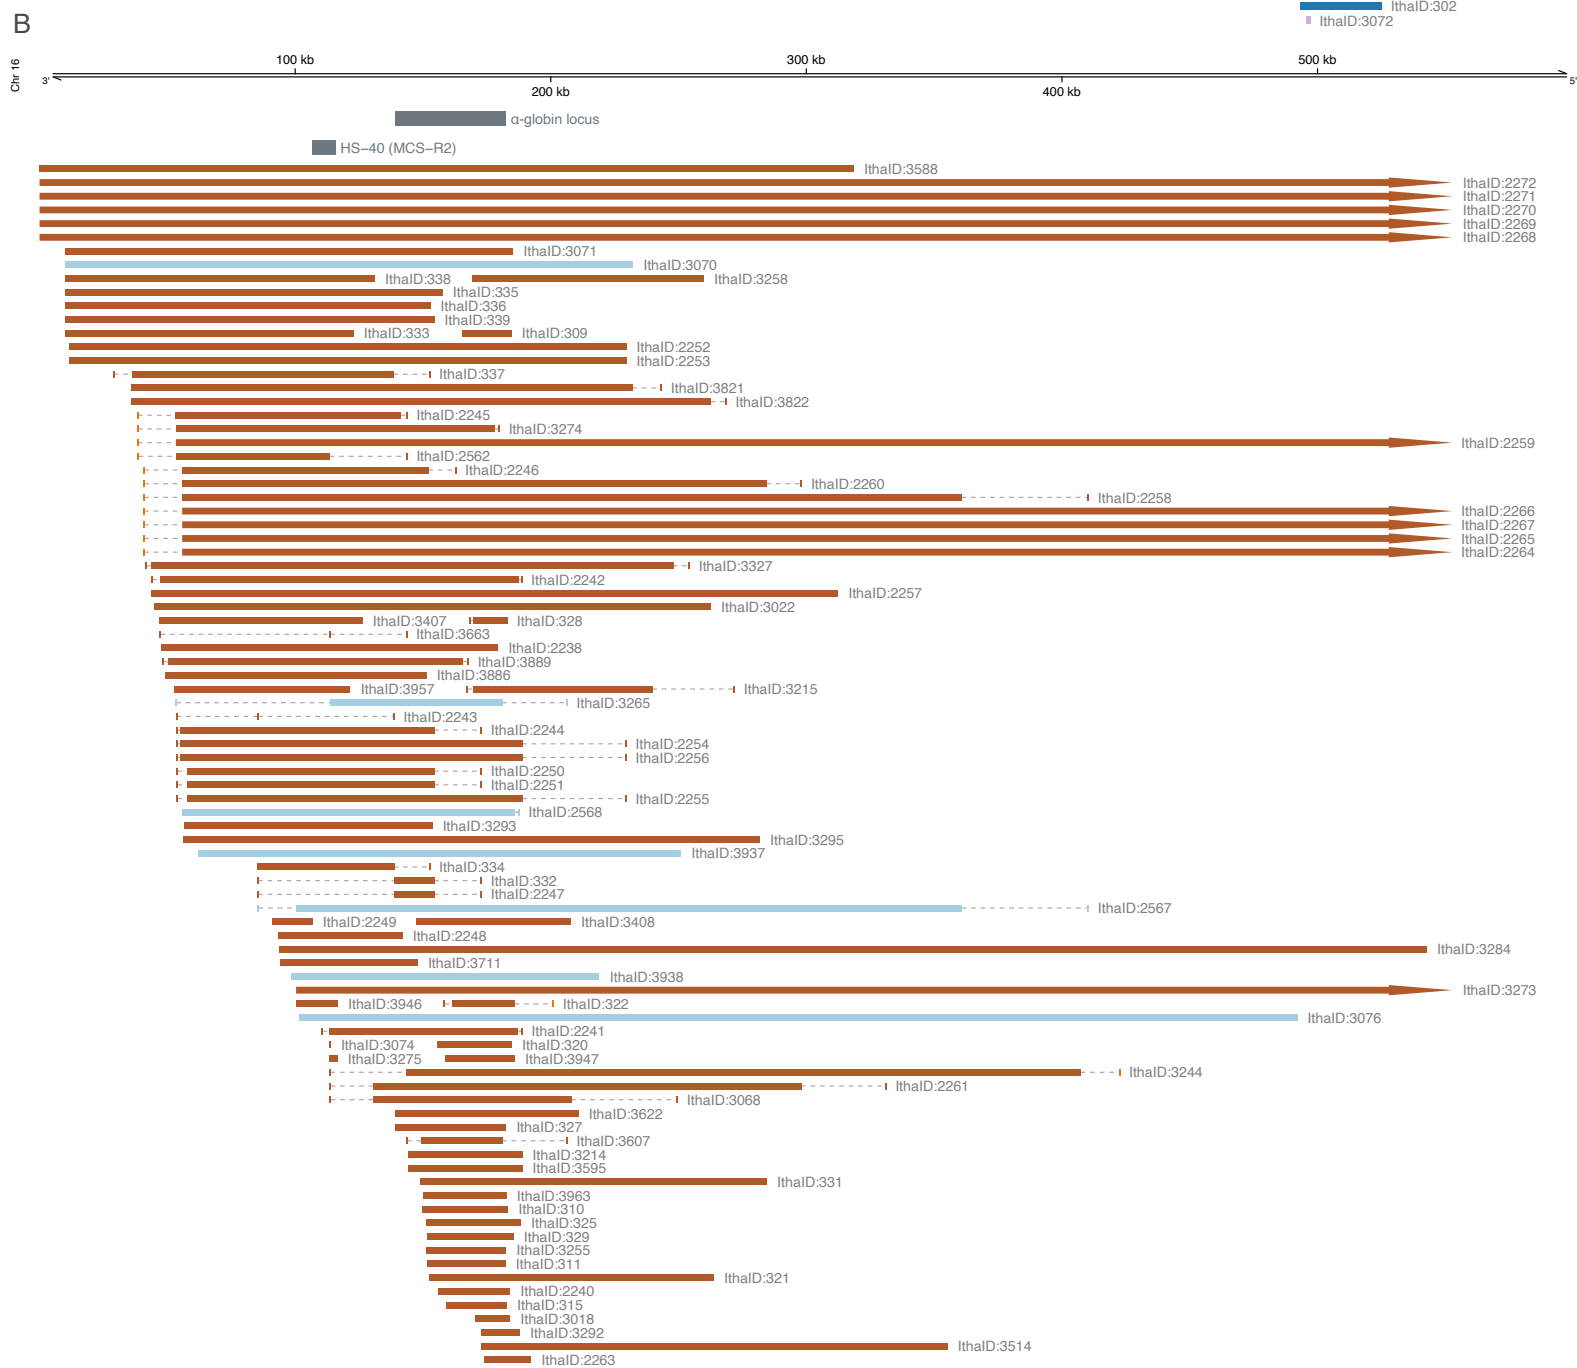

■  $\alpha^+$ -thalassaemia variant ■  $\alpha^0$ -thalassaemia variant ■  $\alpha$ -locus duplication variant ■ Benign variant
