# Supplementary figures and images for: A Novel Tool for the Analysis and Detection of Copy Number Variants Associated with Haemoglobinopathies
Source: MDPI journal article supplement (doi:10.3390/ijms232415920), 2022-12-14

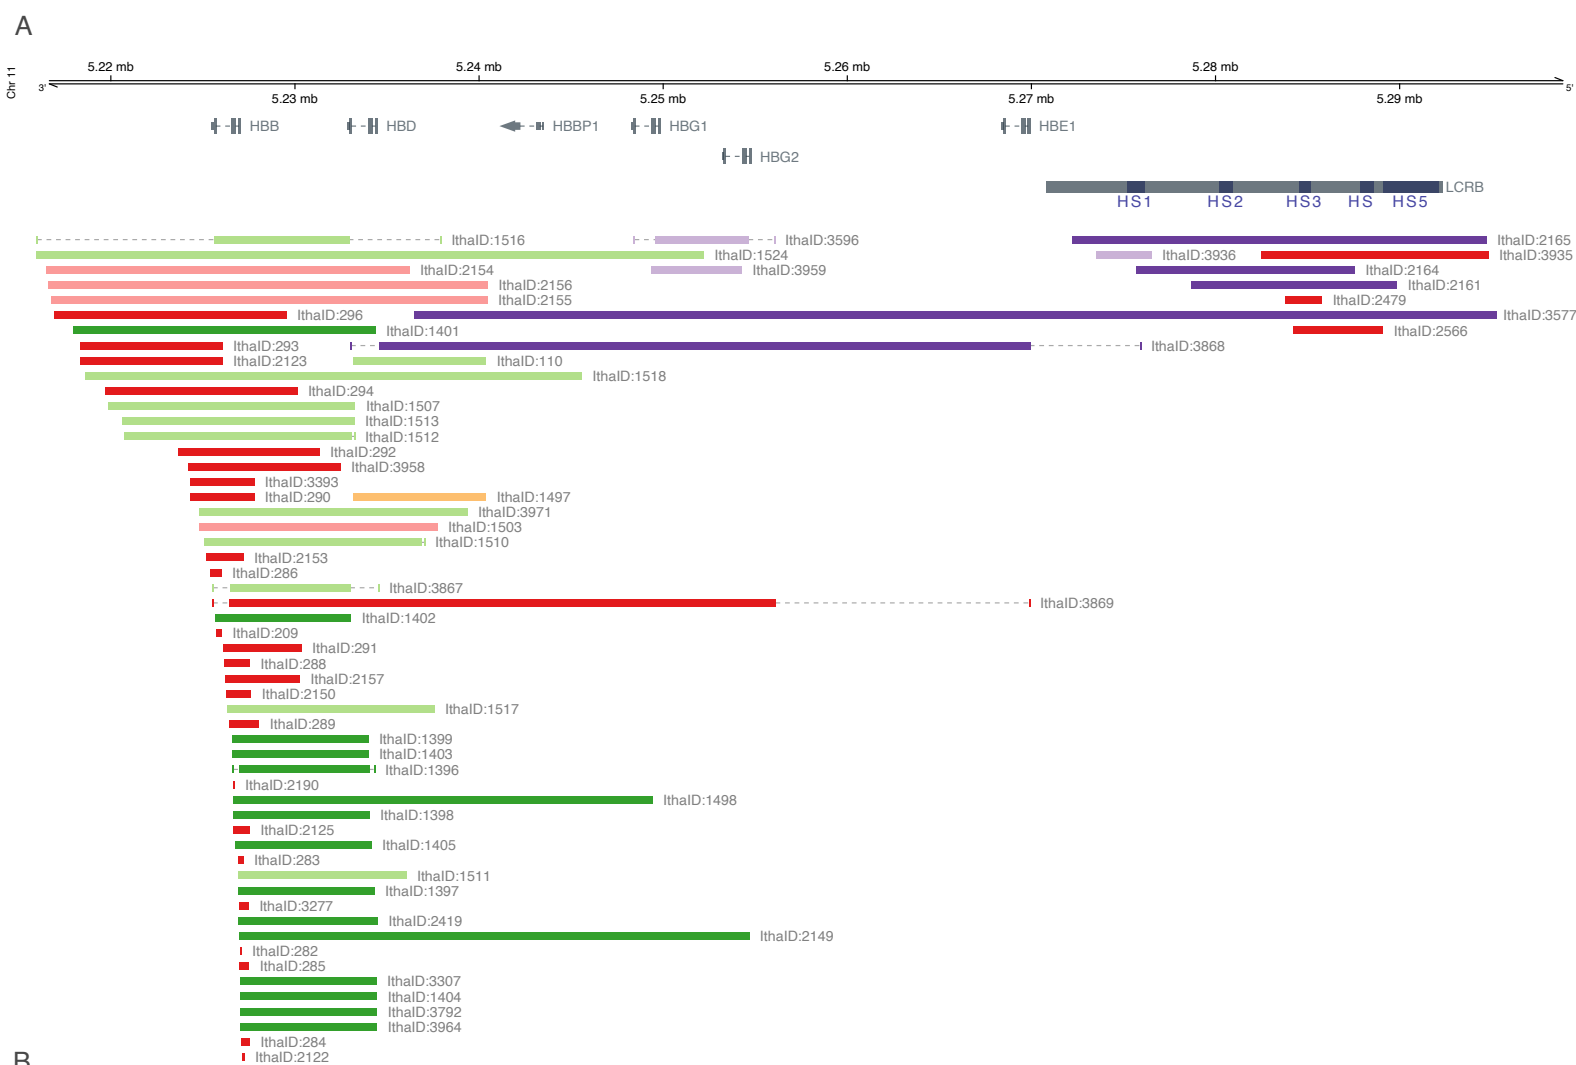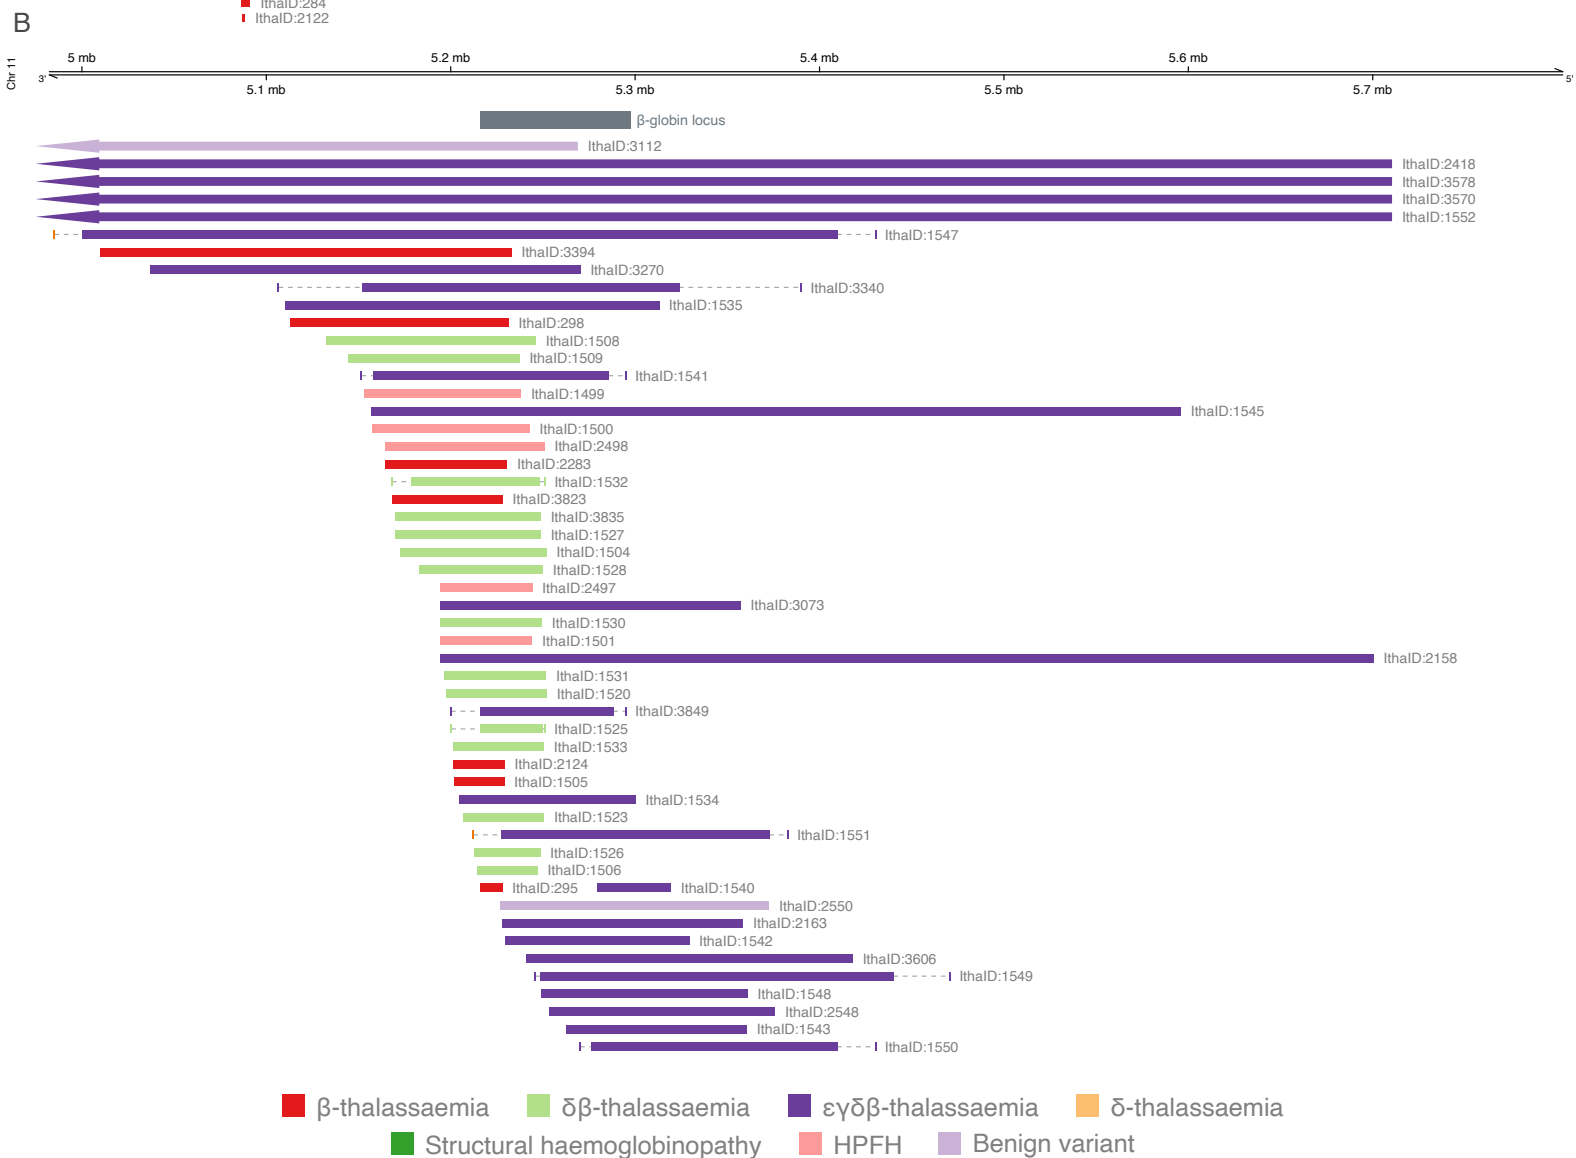

Supplement: s1 [file s1]
